# Supplementary material for: Genetic Adaptation of Siberian Larch (Larix sibirica Ledeb.) to High Altitudes
Source: MDPI journal article supplement (doi:10.3390/ijms24054530), 2023-02-25
Supplement: s1 [file s1]

based on 761 supposedly selectively neutral SNPs  
samples arranged according to their geographic origin

$K = 2$

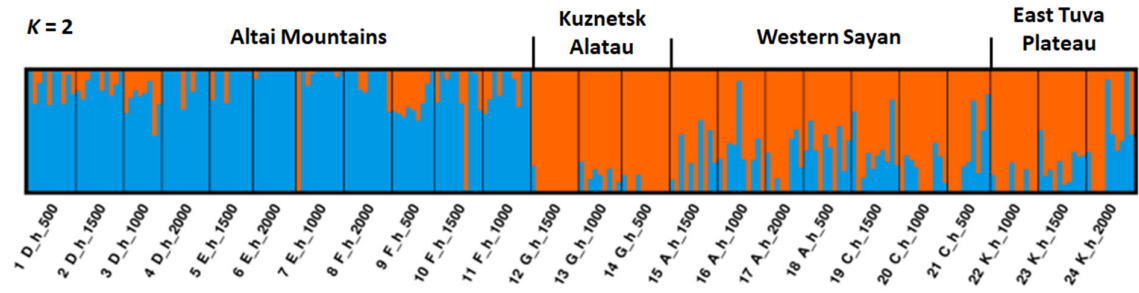

$K = 3$

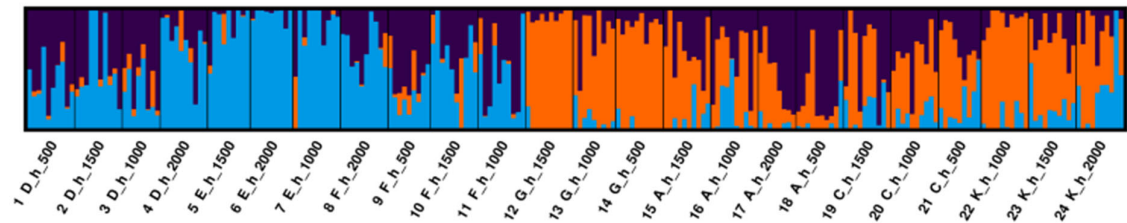

$K = 4$

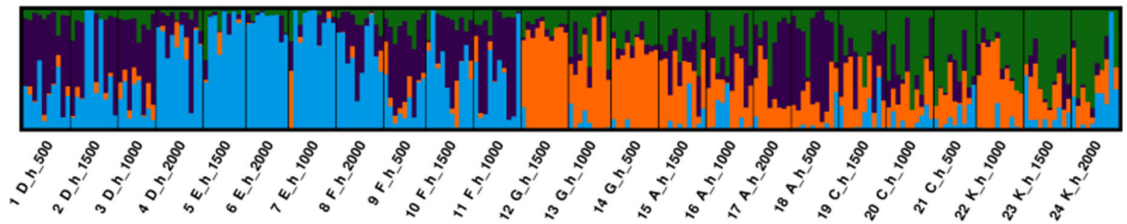

$K = 5$

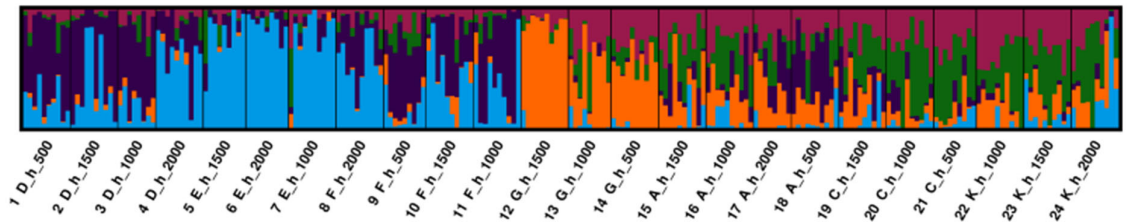

$K = 6$

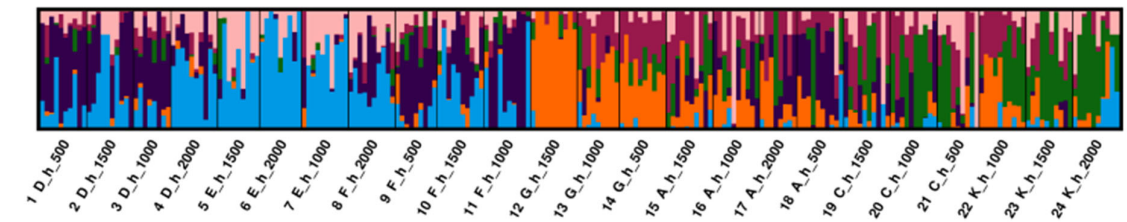

based on 761 supposedly selectively neutral SNPs

samples arranged in order of increasing altitude

$K = 2$

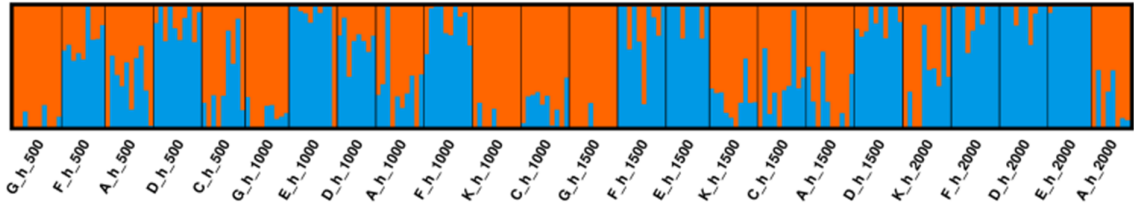

$K = 3$

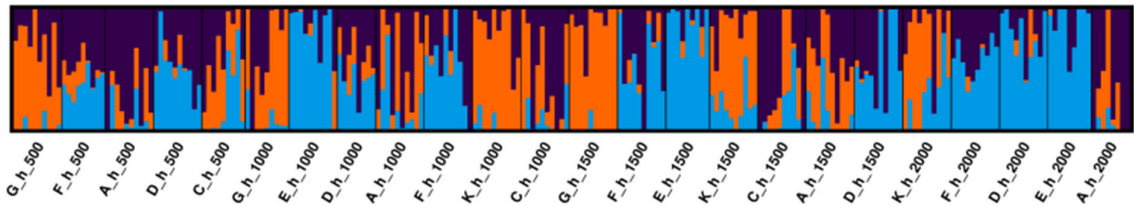

$K = 4$

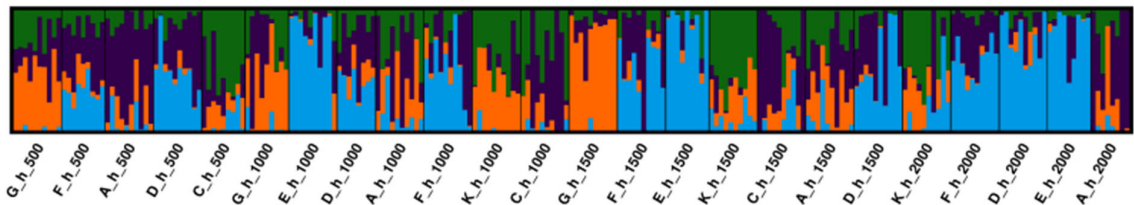

$K = 5$

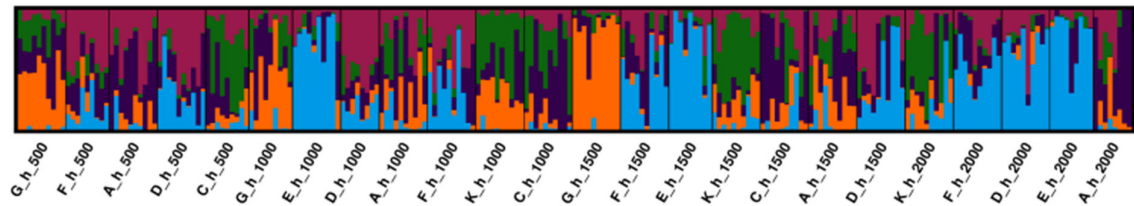

$K = 6$

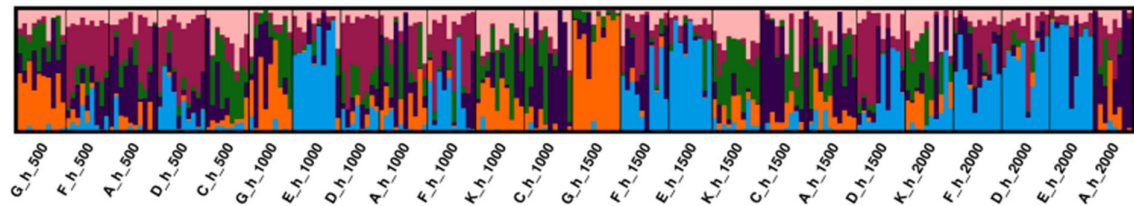

based on all 25,143 SNPs

samples arranged according to their geographic origin

$K = 2$

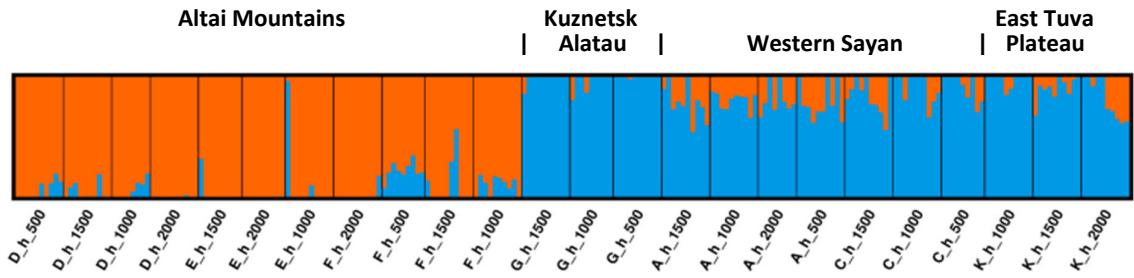

$K = 3$

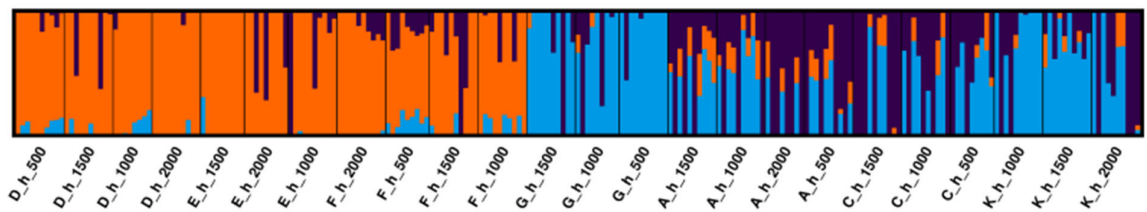

$K = 4$

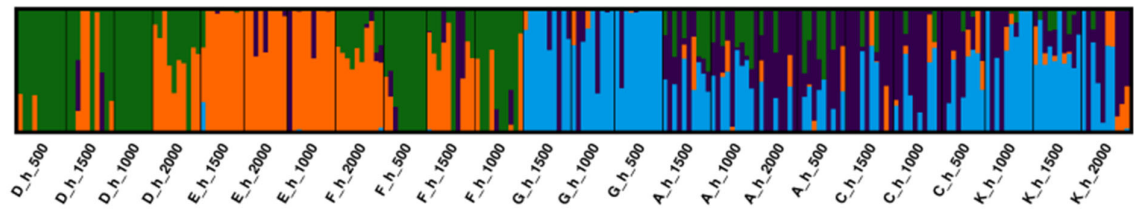

$K = 5$

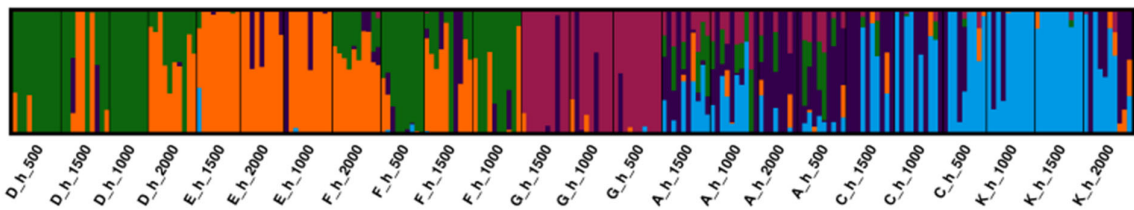

$K = 6$

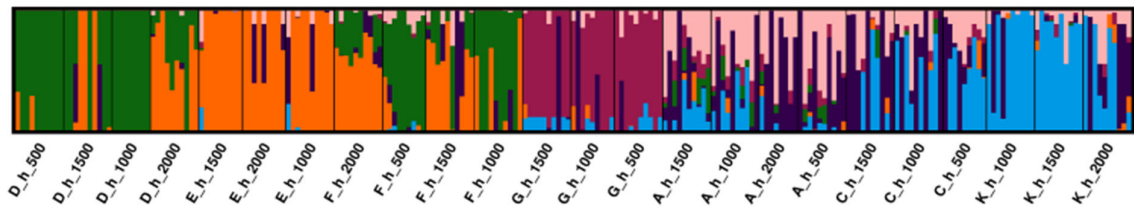

based on all 25,143 SNPs

arranged in order of increasing altitude

$K = 2$

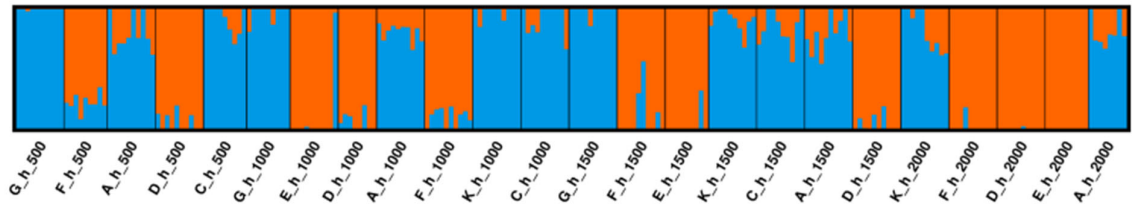

$K = 3$

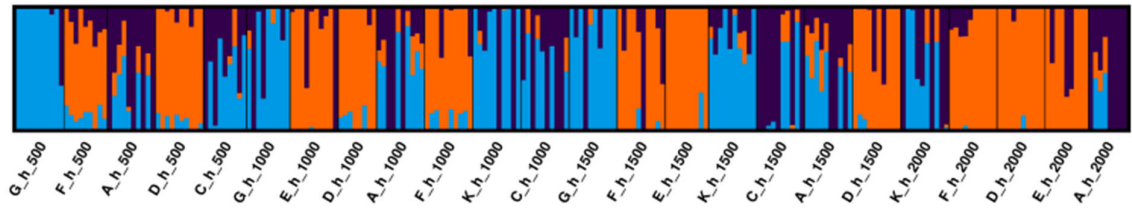

$K = 4$

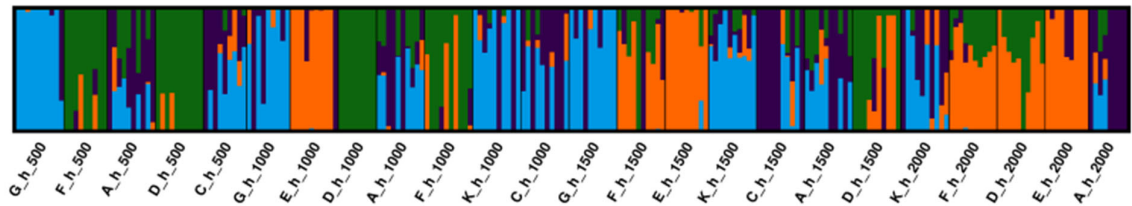

$K = 5$

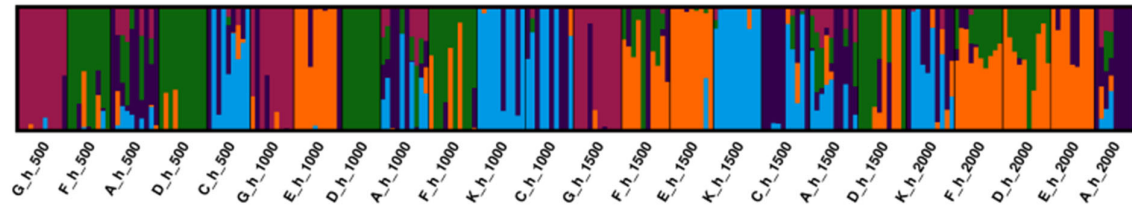

$K = 6$

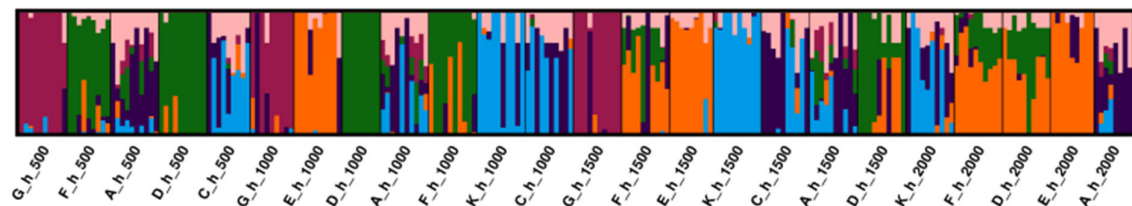

Based on 550 adaptive SNPs

samples arranged according to their geographic origin

$K = 2$

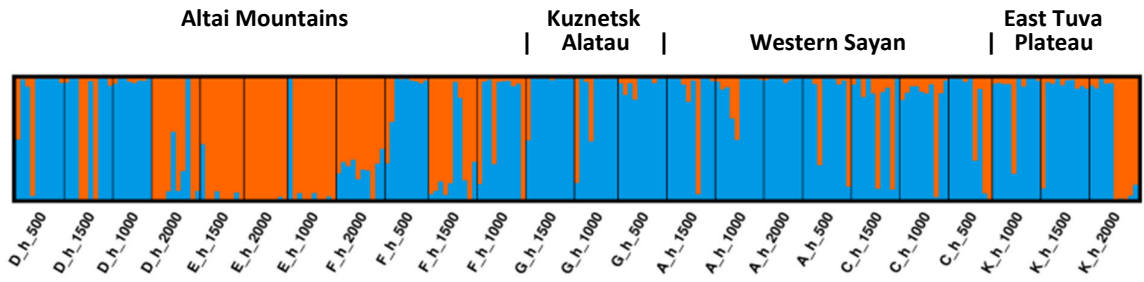

$K = 3$

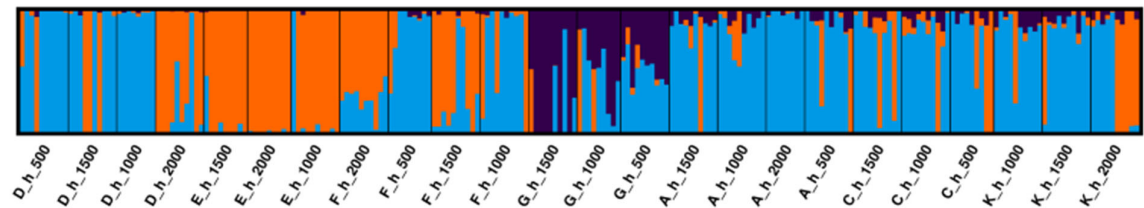

$K = 4$

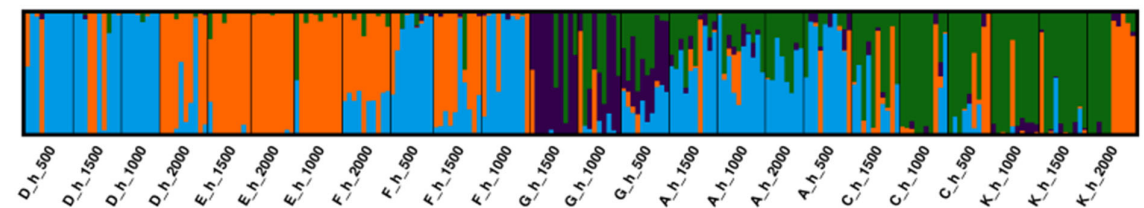

$K = 5$

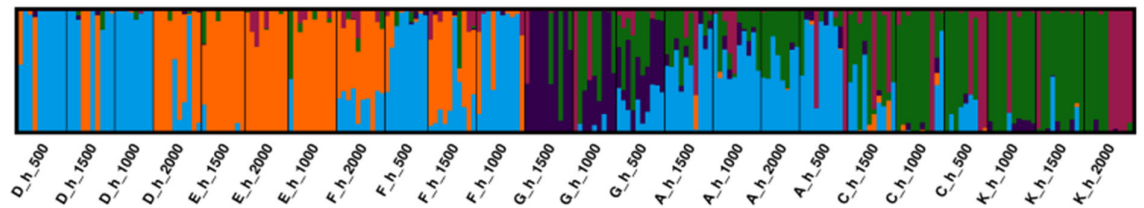

$K = 6$

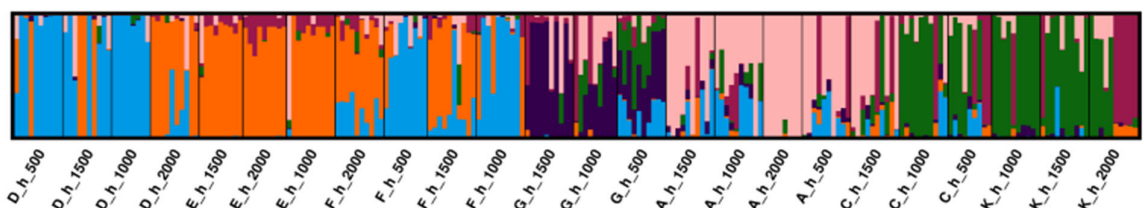



based on 550 adaptive SNPs

samples arranged in order of increasing altitude

$K = 2$

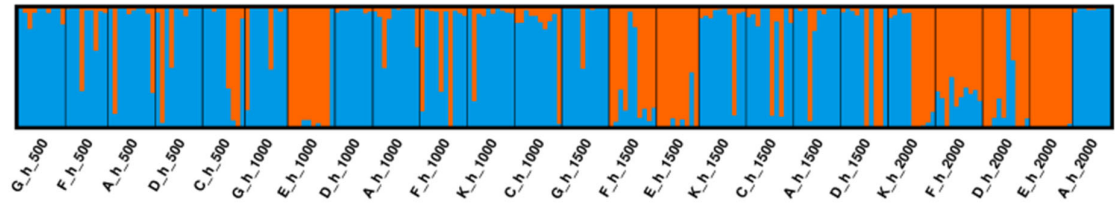

$K = 3$

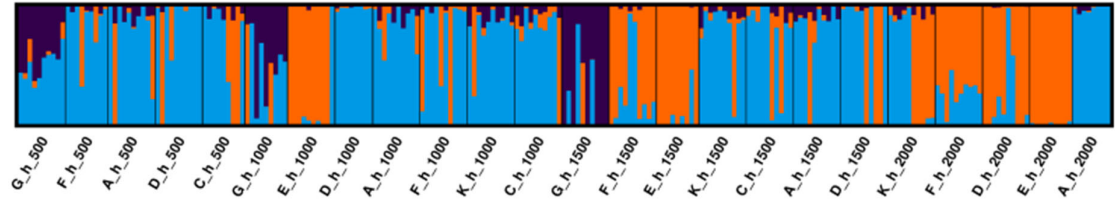

$K = 4$

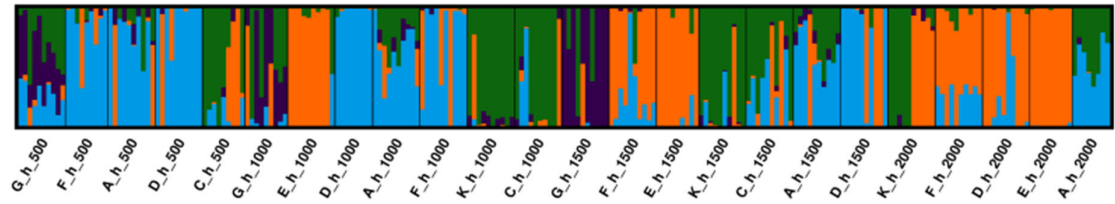

$K = 5$

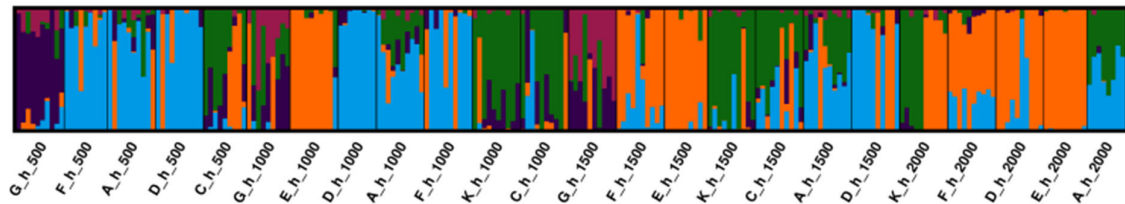

$K = 6$

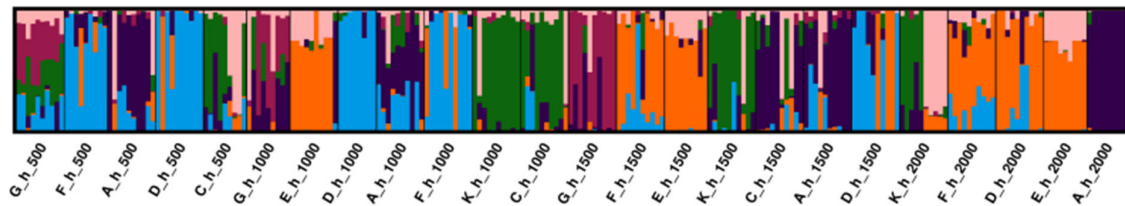

**Figure S1.** Admixture of each of the  $K$  clusters indicated by  $K$  different colors (Q-values) in the individual Siberian larch trees, representing 24 samples collected at different altitudes in four geographic regions and based on three different SNP datasets.
