# Supplementary material for: Genetic Adaptation of Siberian Larch (Larix sibirica Ledeb.) to High Altitudes
Source: MDPI journal article supplement (doi:10.3390/ijms24054530), 2023-02-25
Supplement: s1 [file s1]

**Table S3.** Summary of genetic variation parameters based on 761 neutral and 550 adaptive outlier SNPs for each of 24 population samples of Siberian larch.

| Region                    | Transect | Population sample | N   | PrA   | A <sub>R</sub> | H <sub>o</sub> | H <sub>e</sub> | F <sub>IS</sub>  |
|---------------------------|----------|-------------------|-----|-------|----------------|----------------|----------------|------------------|
| 761 neutral SNPs          |          |                   |     |       |                |                |                |                  |
| Western Sayan Mountain    | A        | A_h_500           | 10  | 0     | 1.241 ± 0.014  | 0.041 ± 0.003  | 0.059 ± 0.004  | 0.213 ± 0.027*** |
|                           |          | A_h_1000          | 10  | 0     | 1.297 ± 0.014  | 0.058 ± 0.004  | 0.068 ± 0.004  | 0.097 ± 0.018*** |
|                           |          | A_h_1500          | 10  | 0     | 1.324 ± 0.014  | 0.063 ± 0.003  | 0.073 ± 0.004  | 0.086 ± 0.016*** |
|                           |          | A_h_2000          | 8   | 0     | 1.235 ± 0.014  | 0.035 ± 0.003  | 0.056 ± 0.004  | 0.265 ± 0.030*** |
|                           | C        | C_h_500           | 9   | 0     | 1.286 ± 0.015  | 0.056 ± 0.004  | 0.071 ± 0.004  | 0.140 ± 0.022*** |
|                           |          | C_h_1000          | 10  | 4     | 1.264 ± 0.014  | 0.039 ± 0.003  | 0.064 ± 0.004  | 0.279 ± 0.026*** |
|                           |          | C_h_1500          | 10  | 0     | 1.239 ± 0.013  | 0.043 ± 0.003  | 0.055 ± 0.003  | 0.156 ± 0.024*** |
| Altai Mountains           | D        | D_h_500           | 10  | 0     | 1.283 ± 0.013  | 0.066 ± 0.004  | 0.065 ± 0.004  | -0.004 ± 0.011   |
|                           |          | D_h_1000          | 8   | 0     | 1.279 ± 0.015  | 0.066 ± 0.004  | 0.065 ± 0.004  | -0.009 ± 0.012   |
|                           |          | D_h_1500          | 10  | 0     | 1.253 ± 0.013  | 0.059 ± 0.004  | 0.060 ± 0.004  | 0.009 ± 0.013    |
|                           |          | D_h_2000          | 10  | 0     | 1.293 ± 0.013  | 0.065 ± 0.004  | 0.066 ± 0.004  | 0.013 ± 0.012    |
|                           | E        | E_h_1000          | 10  | 0     | 1.267 ± 0.013  | 0.051 ± 0.003  | 0.062 ± 0.004  | 0.114 ± 0.020*** |
|                           |          | E_h_1500          | 9   | 0     | 1.295 ± 0.014  | 0.063 ± 0.004  | 0.070 ± 0.004  | 0.073 ± 0.017**  |
|                           |          | E_h_2000          | 9   | 0     | 1.266 ± 0.015  | 0.053 ± 0.004  | 0.066 ± 0.004  | 0.126 ± 0.021*** |
|                           | F        | F_h_500           | 9   | 0     | 1.285 ± 0.014  | 0.068 ± 0.004  | 0.066 ± 0.004  | -0.020 ± 0.011   |
|                           |          | F_h_1000          | 10  | 0     | 1.268 ± 0.013  | 0.062 ± 0.004  | 0.062 ± 0.004  | -0.009 ± 0.010   |
|                           |          | F_h_1500          | 10  | 0     | 1.263 ± 0.013  | 0.059 ± 0.004  | 0.059 ± 0.003  | 0.004 ± 0.012    |
|                           |          | F_h_2000          | 10  | 0     | 1.250 ± 0.013  | 0.060 ± 0.004  | 0.057 ± 0.004  | -0.024 ± 0.011   |
| Kuznetsk Alatau           | G        | G_h_500           | 10  | 0     | 1.290 ± 0.014  | 0.061 ± 0.004  | 0.069 ± 0.004  | 0.075 ± 0.017**  |
|                           |          | G_h_1000          | 9   | 0     | 1.323 ± 0.015  | 0.067 ± 0.004  | 0.078 ± 0.004  | 0.084 ± 0.018**  |
|                           |          | G_h_1500          | 10  | 0     | 1.331 ± 0.014  | 0.072 ± 0.004  | 0.084 ± 0.004  | 0.097 ± 0.017*** |
| East Tuva Highlands       | K        | K_h_1000          | 10  | 5     | 1.299 ± 0.014  | 0.065 ± 0.004  | 0.072 ± 0.004  | 0.060 ± 0.015*   |
|                           |          | K_h_1500          | 10  | 0     | 1.327 ± 0.014  | 0.064 ± 0.004  | 0.076 ± 0.004  | 0.104 ± 0.017*** |
|                           |          | K_h_2000          | 10  | 0     | 1.304 ± 0.015  | 0.057 ± 0.003  | 0.073 ± 0.004  | 0.148 ± 0.021*** |
|                           | Mean     |                   | 9.6 | 0.375 | 1.282 ± 0.006  | 0.058 ± 0.002  | 0.067 ± 0.001  | 0.087 ± 0.017    |
| 550 adaptive outlier SNPs |          |                   |     |       |                |                |                |                  |
| Western Sayan Mountain    | A        | A_h_500           | 10  | 0     | 1.352 ± 0.019  | 0.063 ± 0.006  | 0.109 ± 0.007  | 0.351 ± 0.032*** |
|                           |          | A_h_1000          | 10  | 0     | 1.366 ± 0.018  | 0.093 ± 0.006  | 0.098 ± 0.006  | 0.052 ± 0.020    |
|                           |          | A_h_1500          | 10  | 0     | 1.425 ± 0.018  | 0.093 ± 0.007  | 0.114 ± 0.006  | 0.174 ± 0.024*** |
|                           |          | A_h_2000          | 8   | 0     | 1.216 ± 0.016  | 0.056 ± 0.006  | 0.063 ± 0.006  | 0.100 ± 0.037    |
|                           | C        | C_h_500           | 9   | 0     | 1.341 ± 0.019  | 0.075 ± 0.006  | 0.115 ± 0.008  | 0.228 ± 0.029*** |
|                           |          | C_h_1000          | 10  | 0     | 1.347 ± 0.018  | 0.060 ± 0.005  | 0.105 ± 0.007  | 0.324 ± 0.031*** |
|                           |          | C_h_1500          | 10  | 0     | 1.349 ± 0.018  | 0.080 ± 0.007  | 0.111 ± 0.007  | 0.206 ± 0.029*** |
| Altai Mountains           | D        | D_h_500           | 10  | 0     | 1.323 ± 0.018  | 0.105 ± 0.009  | 0.098 ± 0.006  | 0.009 ± 0.027    |
|                           |          | D_h_1000          | 8   | 0     | 1.251 ± 0.017  | 0.083 ± 0.008  | 0.074 ± 0.006  | -0.059 ± 0.028   |
|                           |          | D_h_1500          | 10  | 0     | 1.346 ± 0.019  | 0.088 ± 0.008  | 0.120 ± 0.008  | 0.169 ± 0.034*** |
|                           |          | D_h_2000          | 10  | 0     | 1.341 ± 0.018  | 0.111 ± 0.008  | 0.109 ± 0.007  | 0.016 ± 0.023    |
|                           | E        | E_h_1000          | 10  | 0     | 1.303 ± 0.018  | 0.069 ± 0.007  | 0.090 ± 0.006  | 0.269 ± 0.034*** |
|                           |          | E_h_1500          | 9   | 0     | 1.312 ± 0.017  | 0.090 ± 0.007  | 0.086 ± 0.006  | -0.016 ± 0.019   |
|                           |          | E_h_2000          | 9   | 0     | 1.206 ± 0.016  | 0.064 ± 0.007  | 0.066 ± 0.006  | 0.022 ± 0.029    |
|                           | F        | F_h_500           | 9   | 0     | 1.347 ± 0.018  | 0.109 ± 0.008  | 0.098 ± 0.006  | -0.038 ± 0.023   |
|                           |          | F_h_1000          | 10  | 0     | 1.313 ± 0.018  | 0.091 ± 0.008  | 0.105 ± 0.007  | 0.085 ± 0.030    |
|                           |          | F_h_1500          | 10  | 0     | 1.321 ± 0.018  | 0.098 ± 0.008  | 0.108 ± 0.007  | 0.077 ± 0.027    |
|                           |          | F_h_2000          | 10  | 0     | 1.314 ± 0.018  | 0.139 ± 0.011  | 0.104 ± 0.007  | -0.204 ± 0.02*** |

| Region    | Transect | Population sample | $N$ | $PrA$ | $A_R$             | $H_o$             | $H_e$             | $F_{IS}$                |
|-----------|----------|-------------------|-----|-------|-------------------|-------------------|-------------------|-------------------------|
| Kuznetsk  | G        | G_h_500           | 10  | 0     | $1.487 \pm 0.018$ | $0.133 \pm 0.007$ | $0.139 \pm 0.007$ | $0.041 \pm 0.017$       |
| Alatau    |          | G_h_1000          | 9   | 0     | $1.646 \pm 0.018$ | $0.154 \pm 0.007$ | $0.200 \pm 0.007$ | $0.170 \pm 0.022^{***}$ |
|           |          | G_h_1500          | 10  | 21    | $1.755 \pm 0.016$ | $0.203 \pm 0.008$ | $0.252 \pm 0.007$ | $0.206 \pm 0.021^{***}$ |
| East Tuva | K        | K_h_1000          | 10  | 0     | $1.377 \pm 0.018$ | $0.077 \pm 0.006$ | $0.111 \pm 0.007$ | $0.230 \pm 0.028^{***}$ |
| Highlands |          | K_h_1500          | 10  | 0     | $1.37 \pm 0.018$  | $0.078 \pm 0.006$ | $0.107 \pm 0.006$ | $0.226 \pm 0.029^{***}$ |
|           |          | K_h_2000          | 10  | 0     | $1.387 \pm 0.019$ | $0.070 \pm 0.006$ | $0.129 \pm 0.008$ | $0.292 \pm 0.031^{***}$ |
| Mean      |          |                   | 9.6 | 0.994 | $1.364 \pm 0.024$ | $0.097 \pm 0.007$ | $0.114 \pm 0.008$ | $0.113 \pm 0.028$       |

$N$  - number of trees,  $PrA$  - the number of private alleles,  $A_R$  - allelic richness,  $H_o$  - observed heterozygosity,  $H_e$  - expected heterozygosity,  $F_{IS}$  - fixation index; \*  $P < 0.05$ , \*\*  $P < 0.01$ , \*\*\*  $P < 0.001$
