# Supplementary material for: Genetic Adaptation of Siberian Larch (Larix sibirica Ledeb.) to High Altitudes
Source: MDPI journal article supplement (doi:10.3390/ijms24054530), 2023-02-25
Supplement: s1 [file s1]

**Table S1.** Mapping of the ddRADseq reads to the reference Siberian larch genome.

| Transect | Reads per sample, M | Unmapped reads, M | Aligned exactly one time, M | Aligned more than one time, M | Overall alignment rate |
|----------|---------------------|-------------------|-----------------------------|-------------------------------|------------------------|
| A        | 16.5 ± 9.9          | 0.690             | 1.378                       | 14.432                        | 96.22%                 |
| C        | 14.7 ± 13.2         | 0.423             | 1.313                       | 13.032                        | 97.22%                 |
| D        | 9.1 ± 3.4           | 0.176             | 0.698                       | 8.241                         | 98.08%                 |
| E        | 16.9 ± 10.5         | 0.948             | 1.469                       | 14.512                        | 94.59%                 |
| F        | 6.4 ± 2.3           | 0.148             | 0.487                       | 5.835                         | 97.60%                 |
| G        | 13.1 ± 5.1          | 0.257             | 1.116                       | 11.775                        | 98.02%                 |
| K        | 12.9 ± 6.02         | 0.374             | 1.092                       | 11.493                        | 97.22%                 |
