# Supplementary figures and images for: Genetic Adaptation of Siberian Larch (Larix sibirica Ledeb.) to High Altitudes
Source: MDPI journal article supplement (doi:10.3390/ijms24054530), 2023-02-25

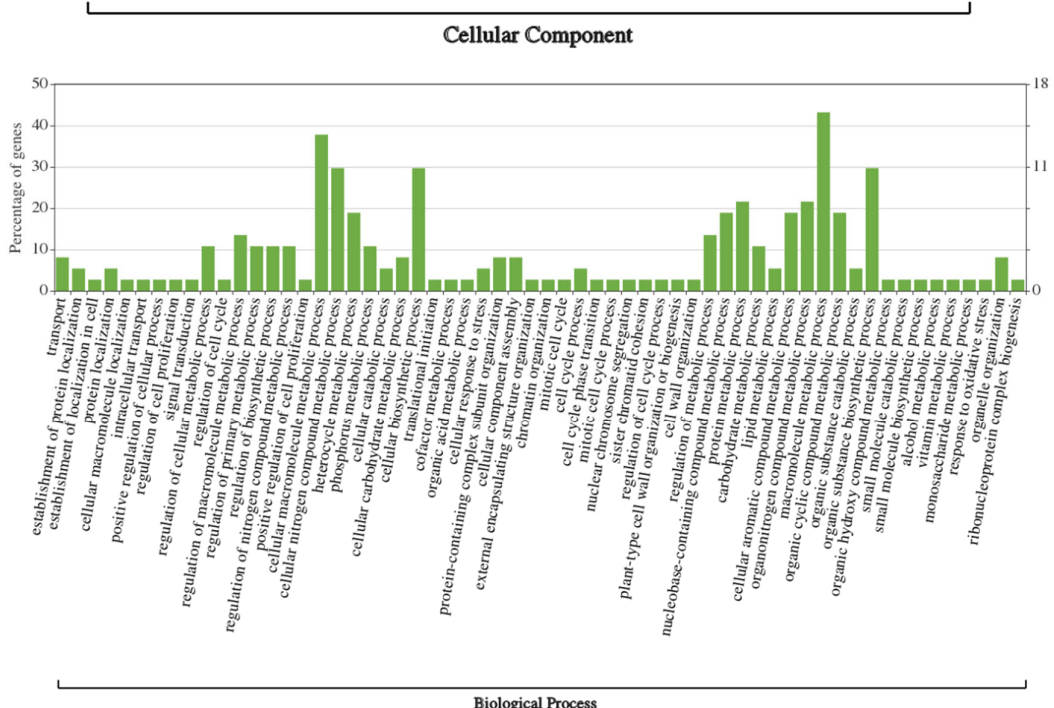

Number of genes

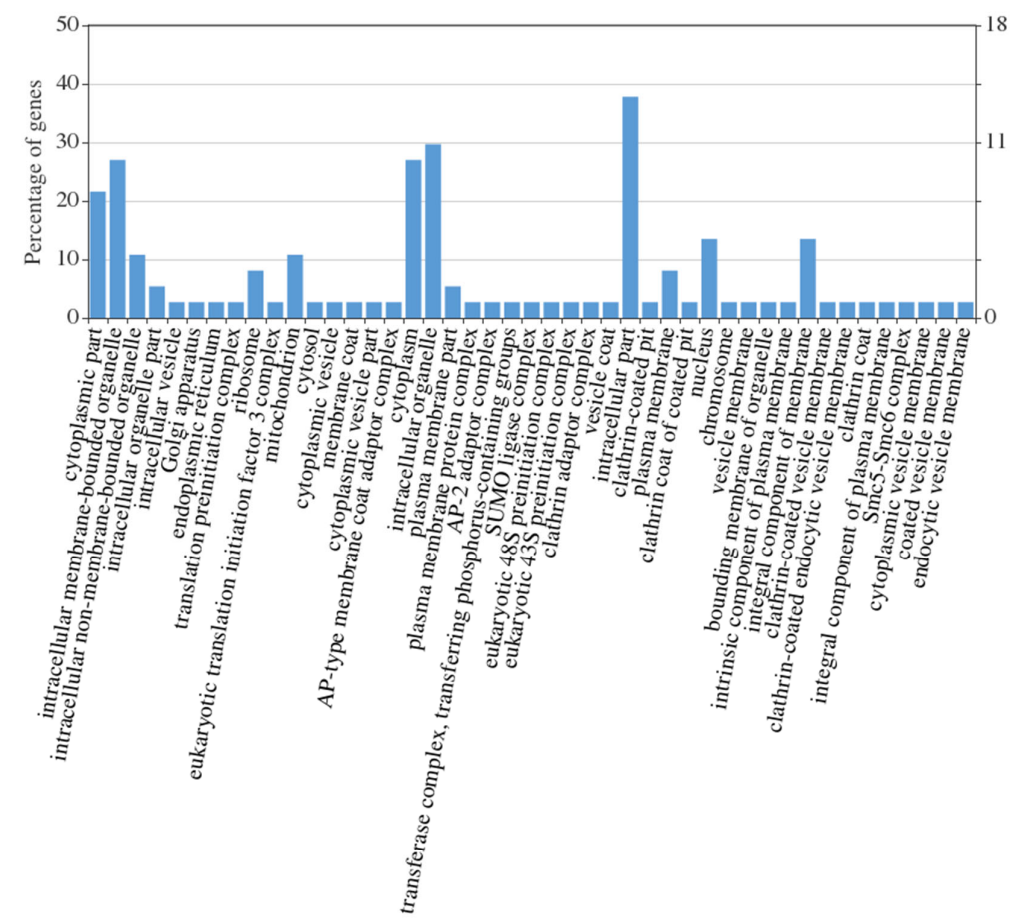

Number of genes

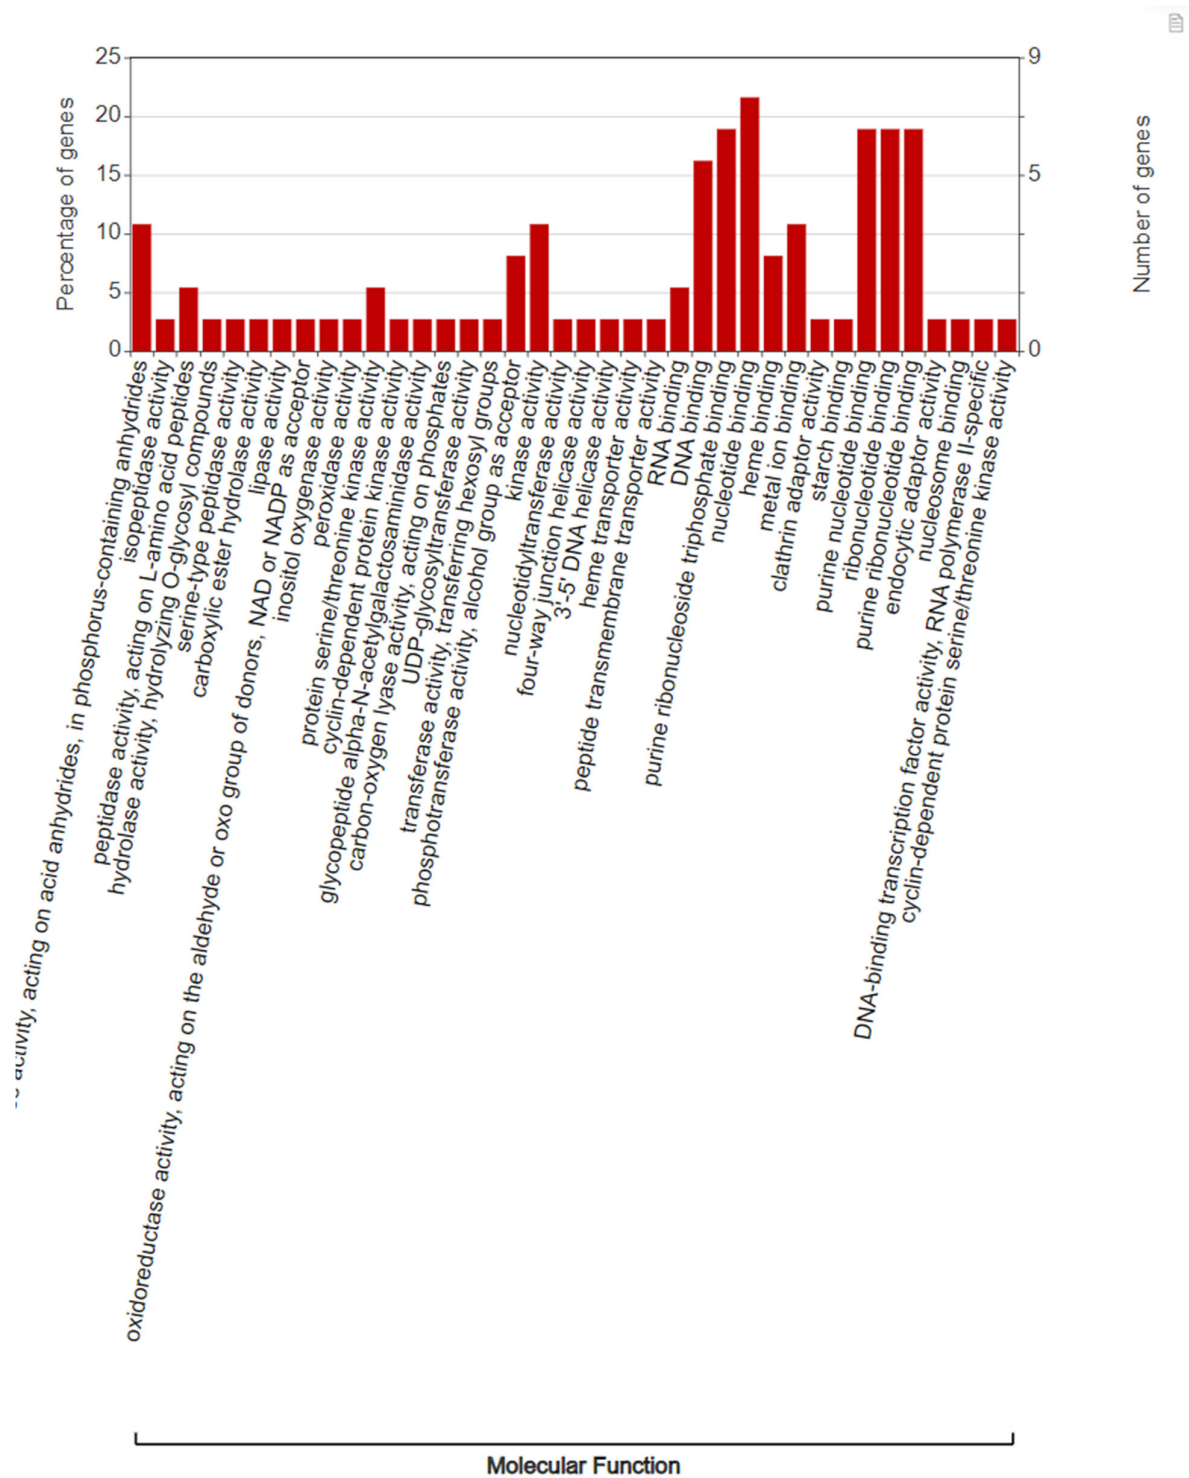

Figure S2. Gene ontology (GO) terms.

Supplement: s1 [file s1]
